# Supplementary material for: Key role of singlet oxygen and peroxynitrite in viral RNA damage during virucidal effect of plasma torch on feline calicivirus
Source: PubMed Central journal article supplement (PMC6298994; doi:10.1038/s41598-018-36779-1), 2018-12-18
Supplement: 41598_2018_36779_MOESM1_ESM.pdf [file 41598_2018_36779_MOESM1_ESM.pdf]

1 **Supplementary Information**

2

3 **Key role of singlet oxygen and peroxyxynitrite in viral RNA damage during virucidal**  
4 **effect of plasma torch on feline calicivirus**

5

6 Risa Yamashiro<sup>1</sup>, Tatsuya Misawa<sup>2</sup>, and Akikazu Sakudo<sup>1\*</sup>

7

8 <sup>1</sup>Laboratory of Biometabolic Chemistry, School of Health Sciences, University of the  
9 Ryukyus, Nishihara, Okinawa 903-0215, Japan

10 <sup>2</sup>Department of Electrical and Electronic Engineering, Faculty of Science and  
11 Engineering, Saga University, Saga 840-8502, Japan

12

13 \*Correspondence and requests for materials should be addressed to A.S. (e-mail:  
14 akikazusakudo@gmail.com)

15 Postal address: Laboratory of Biometabolic Chemistry, School of Health Sciences,  
16 Faculty of Medicine, University of the Ryukyus, 207 Uehara, Nishihara, Okinawa  
17 903-0215, Japan. Tel/Fax:+81-98-895-1252

18

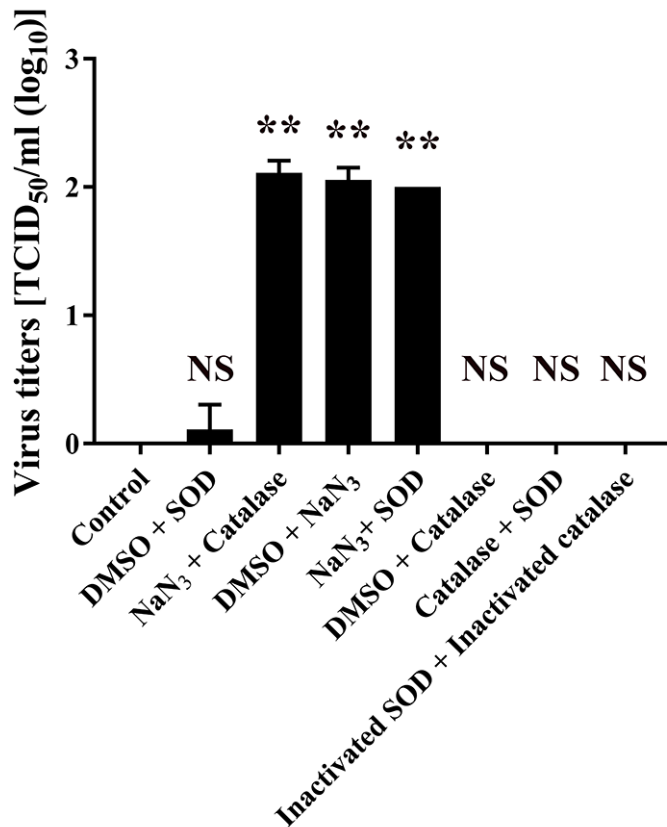

19

20 **Supplemental Fig. 1 Effect of elimination of free radicals by a mixture of two**  
 21 **radical scavengers on viral titer of FCV during operation of the DBD plasma torch**

22 A combination of two radical scavengers (DMSO, SOD, NaN<sub>3</sub>, or catalase) as well as  
 23 inactivated SOD and catalase were added to the FCV-infected cell lysate. Samples were

24 exposed to the DBD plasma torch for 2 min and the viral titer of FCV (TCID<sub>50</sub>)

25 determined. Zero in virus titer means below the detectable limit. Differences where

26  $p < 0.01$ (\*\*) versus Control were considered significant, while NS means no

27 significance.

28

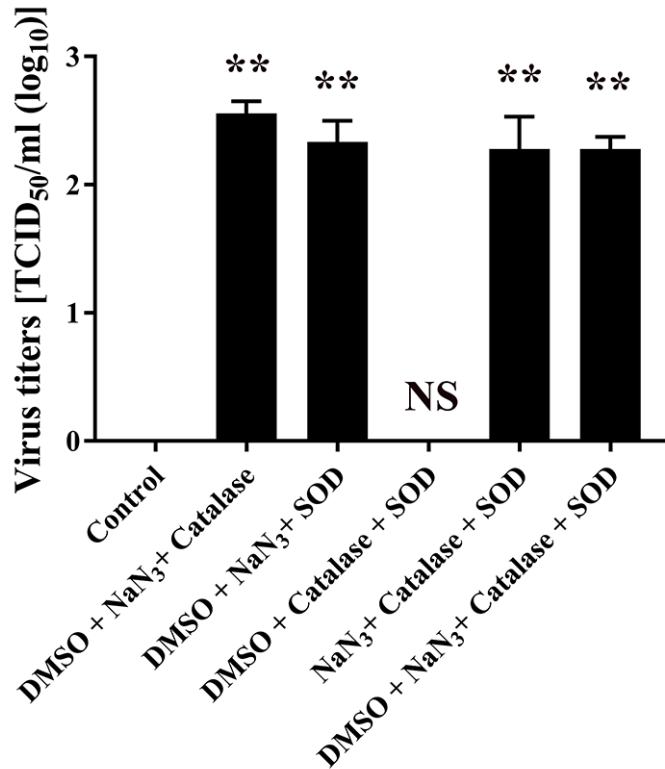

29

30 **Supplemental Fig. 2 Effect of elimination of free radicals by a mixture of three**  
 31 **radical scavengers on viral titer of FCV during operation of the DBD plasma torch**

32 A combination of three radical scavengers (DMSO, SOD, NaN<sub>3</sub>, or catalase) as well as  
 33 inactivated SOD and catalase were added to the FCV-infected cell lysate. Samples were  
 34 exposed to the DBD plasma torch for 2 min before determining the viral titer of FCV  
 35 (TCID<sub>50</sub>). Zero in virus titer means below the detectable limit. Differences where

36  $p < 0.01$  (\*\*) versus Control were considered significant, while NS means no

37 significance.

38

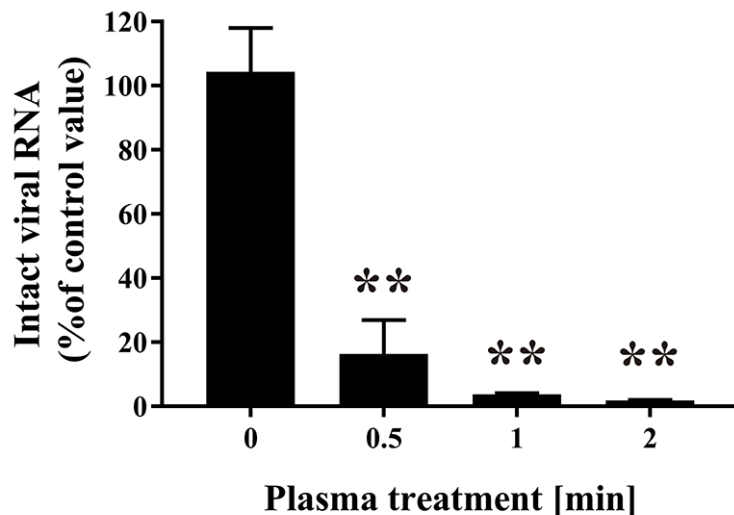

39

40 **Supplemental Fig. 3 Quantitative analysis of rotavirus RNA after DBD plasma**  
 41 **torch treatment**

42 Rotavirus Wa strain [VR-2018; ATCC (American type Culture Collection, Manassas,  
 43 VA, USA)]-infected cell lysates of MA104 cells were subjected to DBD plasma torch  
 44 treatment for the indicated time (min). Viral RNA was extracted and subjected to a  
 45 reverse transcription (RT) reaction. The levels of intact viral RNA were then analyzed  
 46 by real-time polymerase chain reaction (PCR) using primers specific for rotavirus (i.e.  
 47 forward and reverse primers: 5'- GTA CCG TGAAAG TGT GTC CG-3'; 5'- TCC CAT  
 48 CAA CGA CAT CCA CT-3', respectively). Differences where  $p < 0.01$  (\*\*) versus  
 49 control (0 min) were considered significant. The real-time PCR product (126 bp) was  
 50 confirmed to be viral coat protein VP7 of human rotavirus A Wa strain (identical to  
 51 Genbank accession number FJ423153 100%) by DNA sequencing after subcloning into  
 52 Takara T-Vector pMD20 (Takara Bio Inc.), with an ABI3730XL Genetic Analyzer  
 53 (Applied Biosystems).

54

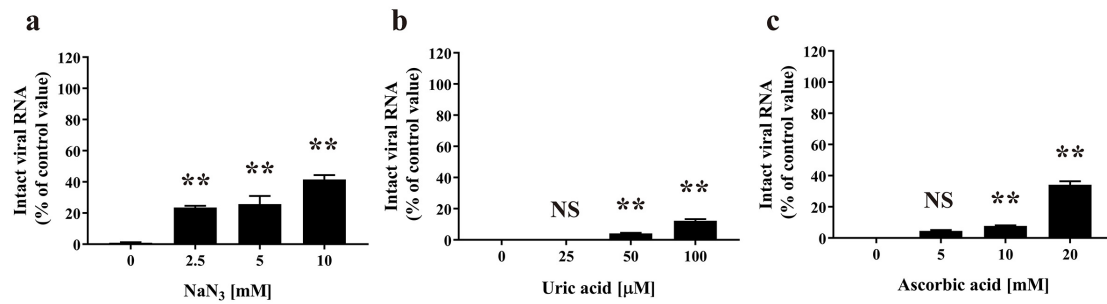

55

56 **Supplemental Fig. 4 Elimination of <sup>1</sup>O<sub>2</sub>, ONOO<sup>-</sup>, and ONOOH prevents viral RNA**  
 57 **damage of rotavirus by the DBD plasma torch**

58 Rotavirus Wa strain-infected cell lysates of MA104 cells plus the indicated  
 59 concentrations of radical scavengers for <sup>1</sup>O<sub>2</sub> (NaN<sub>3</sub>) (a), ONOO<sup>-</sup> (uric acid) (b), and  
 60 ONOOH (ascorbic acid) (c) were subjected to DBD plasma torch treatment for 2 min.  
 61 Viral RNA was extracted and subjected to reverse transcription. The levels of intact  
 62 viral RNA were then analyzed by real-time PCR using specific primers for rotavirus as  
 63 described in Supplemental Fig. 3. Differences with *p*<0.01(\*\*) versus the control (no  
 64 NaN<sub>3</sub>, ascorbic acid or uric acid) were considered significant; NS means no  
 65 significance.
